# Supplementary material for: Sugar transporters enable a leaf beetle to accumulate plant defense compounds
Source: PubMed Central journal article supplement (PMC8113468; doi:10.1038/s41467-021-22982-8), 2021-05-11
Supplement: 41467_2021_22982_MOESM1_ESM.pdf [file 41467_2021_22982_MOESM1_ESM.pdf]

## Supplementary Information

### **Sugar transporters enable a leaf beetle to accumulate plant defense compounds**

Zhi-Ling Yang<sup>1</sup>, Hussam Hassan Nour-Eldin<sup>2</sup>, Sabine Hänniger<sup>3</sup>, Michael Reichelt<sup>4</sup>, Christoph Crocoll<sup>2</sup>, Fabian Seitz<sup>1</sup>, Heiko Vogel<sup>3</sup> & Franziska Beran<sup>1</sup>

<sup>1</sup>Research Group Sequestration and Detoxification in Insects, Max Planck Institute for Chemical Ecology, Jena, Germany.

<sup>2</sup>DynaMo Center, Department of Plant and Environmental Sciences, Faculty of Science, University of Copenhagen, Frederiksberg, Denmark.

<sup>3</sup>Department of Entomology, Max Planck Institute for Chemical Ecology, Jena, Germany.

<sup>4</sup>Department of Biochemistry, Max Planck Institute for Chemical Ecology, Jena, Germany

#### **This pdf file includes:**

Supplementary Figures 1-10

Supplementary Tables 1-5

## Supplementary Figures

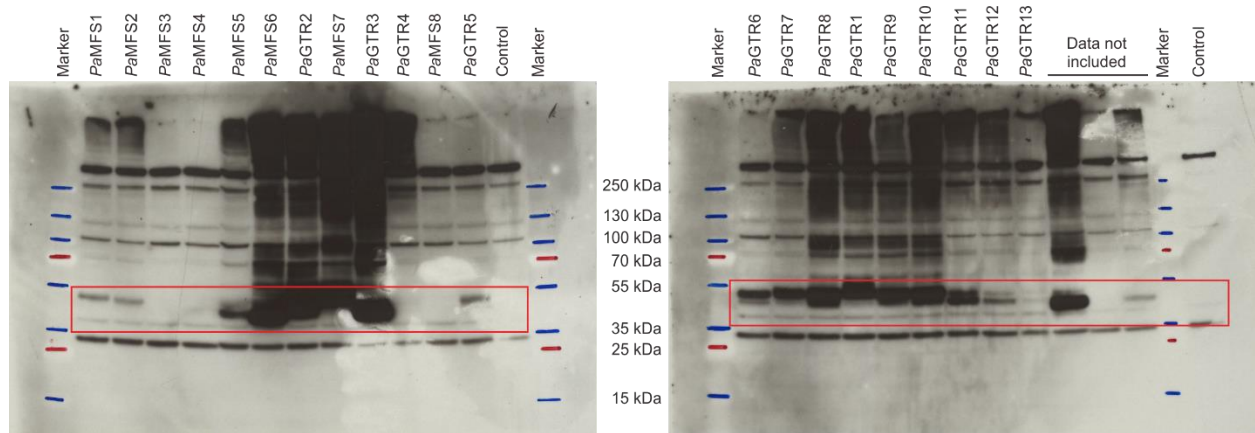

**Supplementary Figure 1. Detection of recombinant transporters expressed in High Five insect cells by Western blotting.** The red rectangles highlight blot regions with recombinant proteins. Protein marker bands are marked with blue and red lines on the film. Heterologous expression of candidate transporters in insect cells followed by Western blotting was repeated three times.

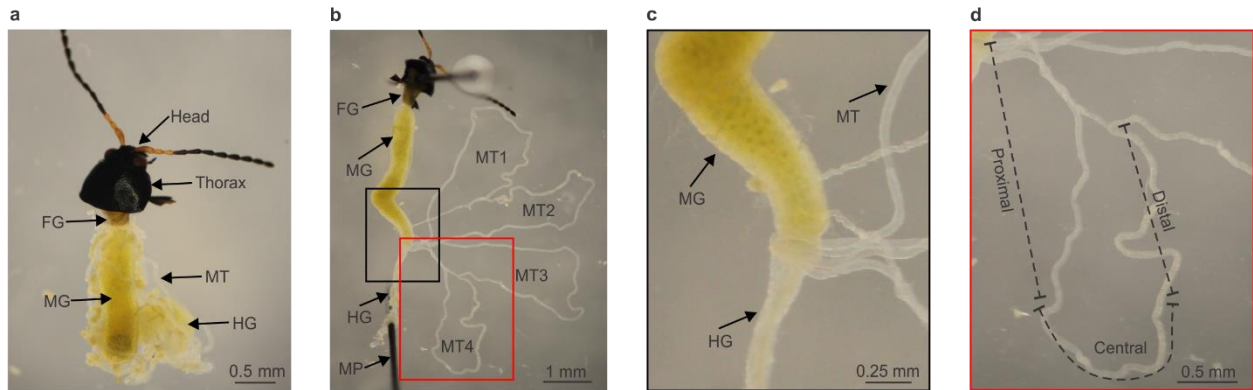

**Supplementary Figure 2. Morphology of the Malpighian tubule system of *P. armoraciae*.** **a** Gut with Malpighian tubules dissected from a four-day old adult *P. armoraciae* beetle. **b** Malpighian tubule system consisting of four tubules (MT1-4) that empty at their proximal ends near the midgut-hindgut junction. Two tubules each fuse at their distal ends and appear to be attached to the midgut. **c** Magnification of the midgut-hindgut junction framed in black in panel **b**. **d** Magnification of one tubule (MT4) framed in red in panel **b**. Expression of candidate transporters was analyzed in the proximal, central and distal sections (marked with dotted lines) by quantitative PCR (shown in Fig. 1e). FG, foregut; MG, midgut; HG, hindgut; MT, Malpighian tubules; MP, metal pin. Three different beetles were dissected to establish the morphology of the Malpighian tubule system.

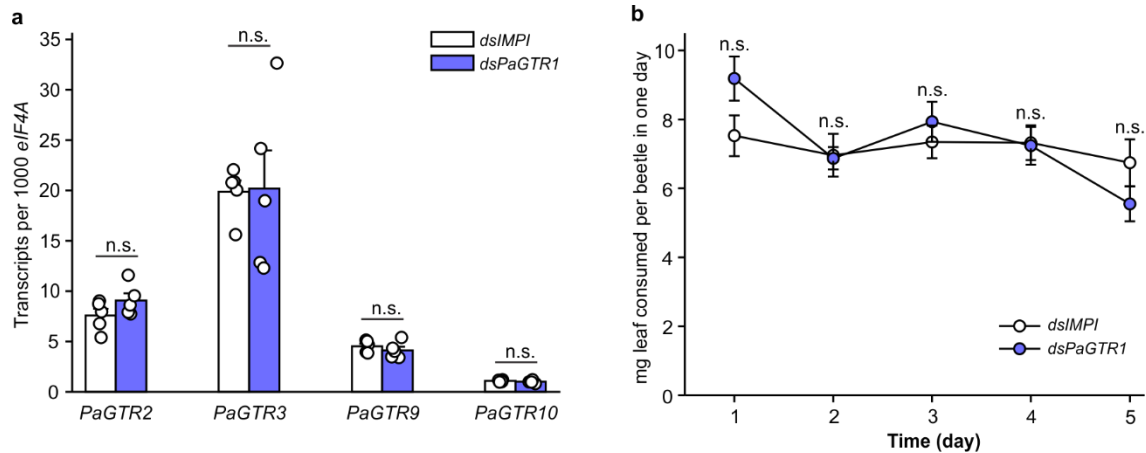

**Supplementary Figure 3. Analysis of potential off-target effects of *dsPaGTR1*-injection and comparison of beetle feeding on *Arabidopsis* leaves.** **a** Four days after dsRNA injection, the gene expression of *PaGTR2*, *PaGTR3*, *PaGTR9* and *PaGTR10* was determined by quantitative PCR to assess whether there was off-target silencing on other *PaGTRs*. The nucleotide sequence of *PaGTR1* was most similar to *PaGTR9* and *PaGTR10* in the *P. armoraciae* transcriptome. Recombinant *PaGTR2*, *PaGTR3* and *PaGTR9* were also active towards indol-3-ylmethyl glucosinolate ( $n = 5$  biological replicates, three beetles per replicate). **b** Four days after dsRNA injection, adults were allowed to feed on *Arabidopsis* leaves for five days ( $n = 10$  biological replicates, feeding damage of five beetles per replicate). Treatments were compared by two-tailed Student's *t*-test or Mann-Whitney *U* test. Data are shown as mean  $\pm$  s.e.m. n.s., not significantly different. *P* values are included in Supplementary Data 6.

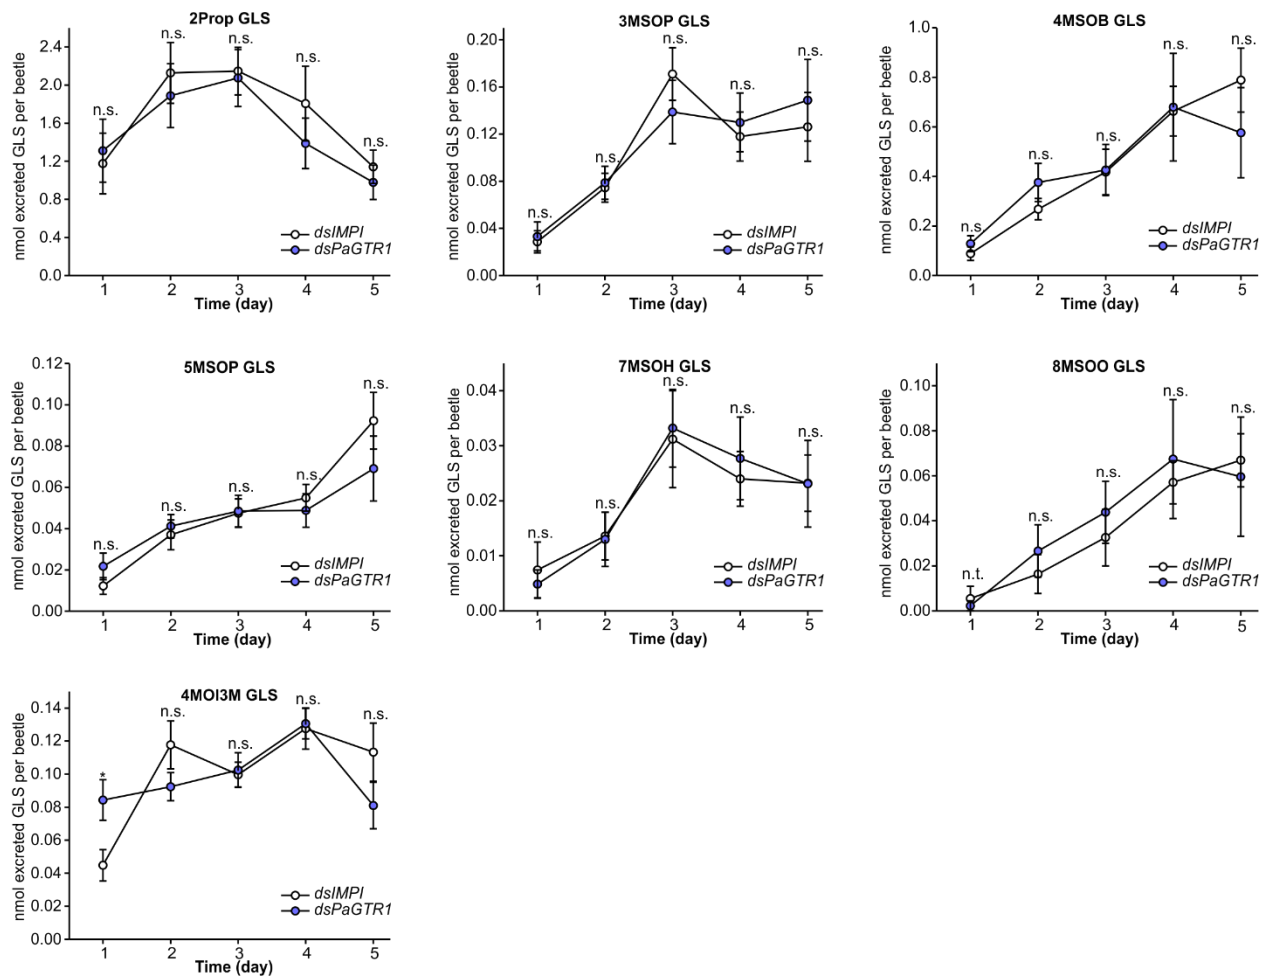

**Supplementary Figure 4. Time course of glucosinolate excretion during feeding on *Arabidopsis* by adult *P. armoraciae* after *dsIMPI*- or *dsPaGTR1*-injection.** The excreted glucosinolate amounts on each day were compared by two-tailed Student's *t*-test or Mann-Whitney *U* test ( $n = 9-10$  biological replicates, feces of five beetles per replicate). Data are shown as mean  $\pm$  s.e.m. n.t., not tested; n.s., not significantly different; \*  $P < 0.05$ ; 2Prop, 2-propenyl; 3MSOP, 3-methylsulfinylpropyl; 4MSOB, 4-methylsulfinylbutyl; 5MSOP, 5-methylsulfinylpentyl; 7MSOH, 7-methylsulfinylheptyl; 8MSOO, 8-methylsulfinyloctyl; 4MOI3M, 4-methoxyindol-3-ylmethyl. *P* values are included in Supplementary Data 6.

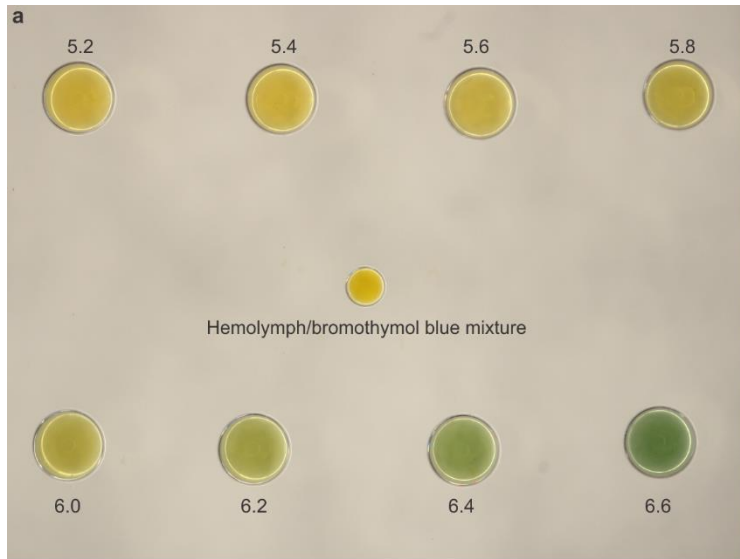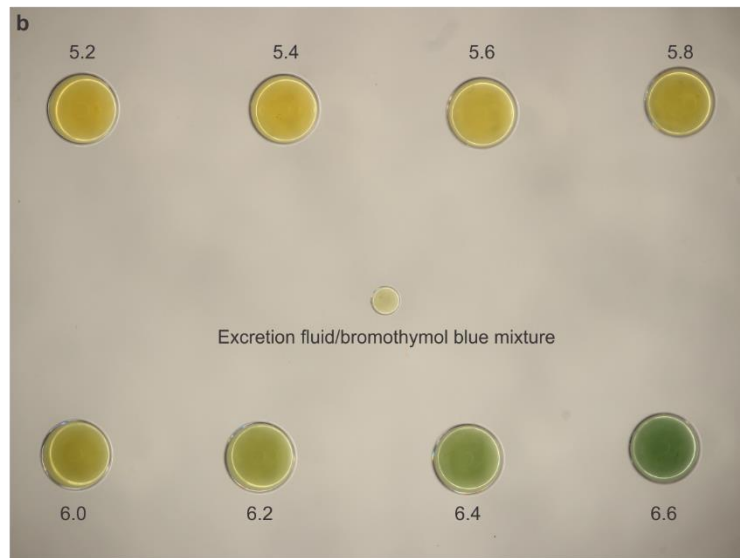

**Supplementary Figure 5. pH of hemolymph (a) and excretion fluid of isolated Malpighian tubules (b) of *P. armoraciae* adults.** Hemolymph and excretion fluid were mixed with an equal volume of 0.16% (w/v) bromothymol blue. Buffered standard solutions from pH 5.2 to 6.6 containing 0.08% bromothymol blue are shown as reference. The analysis was performed with three independent collections of hemolymph and excretion fluid, respectively.

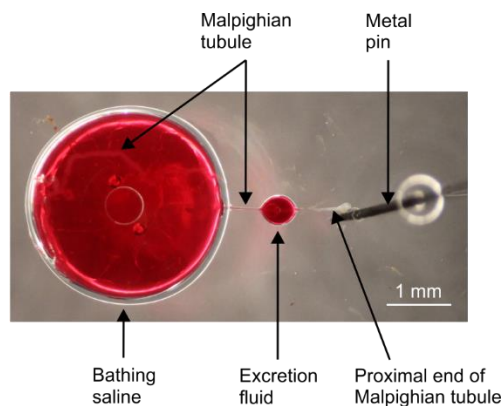

**Supplementary Figure 6. Preparation of *P. armoraciae* Malpighian tubule for glucoside excretion assay (Ramsay assay).** The dissected Malpighian tubule was placed in a droplet of bathing saline under water-saturated paraffin-oil, the proximal end was drawn out of the droplet, attached to the Sylgard-coated petri dish with a metal pin, and cut to allow the collection of excretion fluid. A mixture of eight different plant glucosides, each at a concentration of 6.7 mM, and 0.1% (w/v) amaranth was added to the saline. After 2-3 h, the bathing saline, Malpighian tubule and excretion fluid were sampled and the glucoside composition analyzed by LC-MS/MS. A total of 36 Ramsay assays were performed of which 11 could be analyzed because a sufficient amount of excretion fluid was formed.

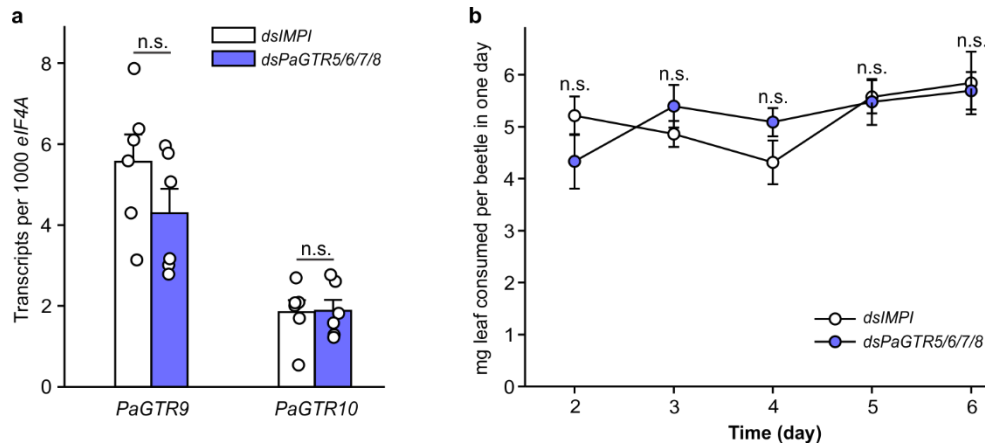

**Supplementary Figure 7. Analysis of potential off-target effects of *dsPaGTR5/6/7/8*-injection and comparison of beetle feeding on *Arabidopsis* leaves. **a** Six days after dsRNA injection, the gene expression of *PaGTR9* and *PaGTR10* was determined by quantitative PCR to assess whether there was off-target silencing on other *PaGTRs*. The nucleotide sequence of *PaGTR5/6/7/8* was most similar to *PaGTR9* and *PaGTR10* in the *P. armoraciae* transcriptome ( $n = 6$  biological replicates, two beetles per replicate). **b** After dsRNA injection, adults were allowed to feed on *Arabidopsis* leaves for six days. Fed amounts of each day were recorded from the second to the sixth day ( $n = 10$  biological replicates, feeding damage of six beetles per replicate). Treatments were compared by two-tailed Student's *t*-test. Data are shown as mean  $\pm$  s.e.m. n.s., not significantly different. *P* values are included in Supplementary Data 6.**



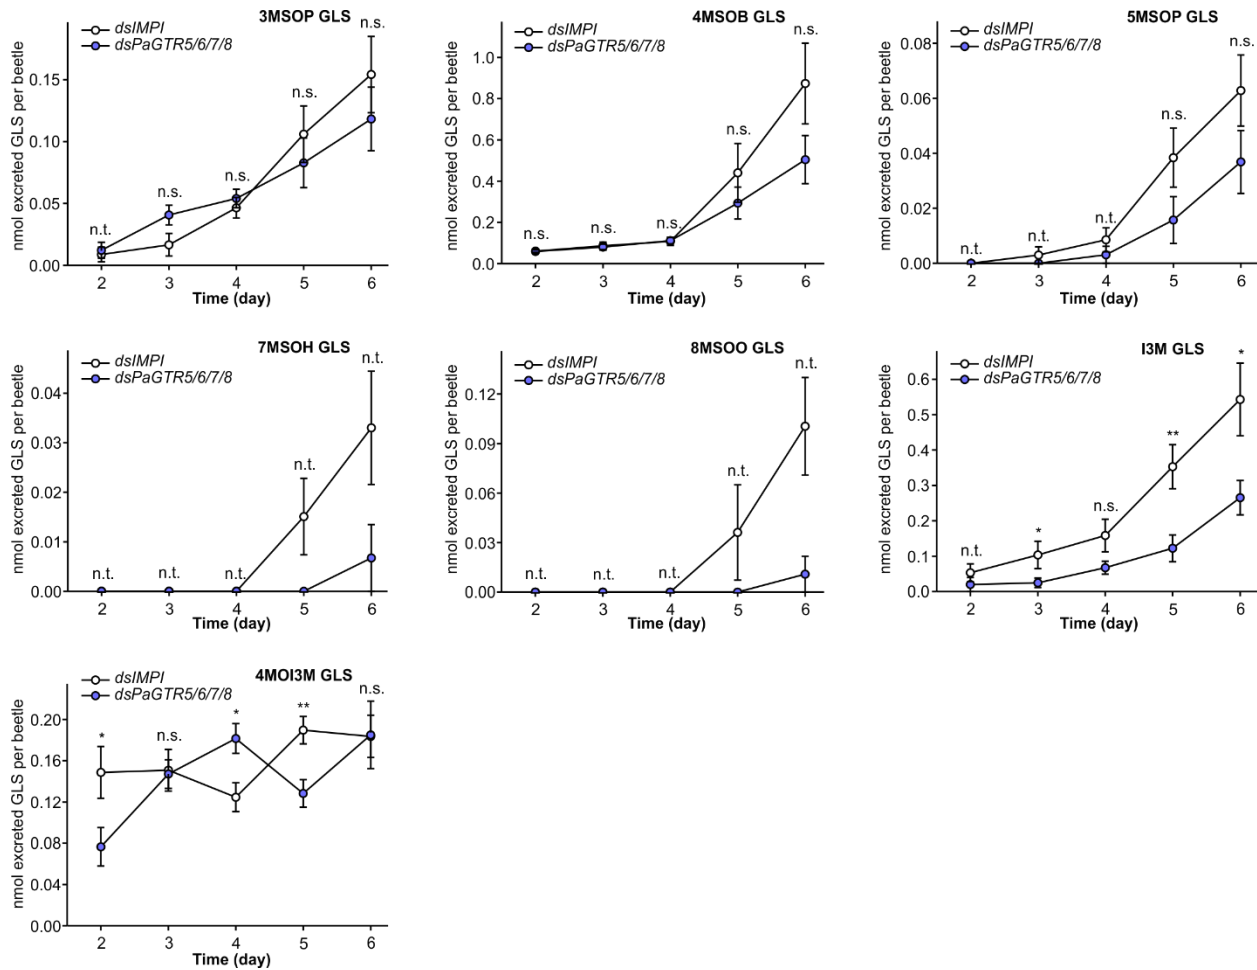

**Supplementary Figure 8. Time course of glucosinolate excretion during feeding on *Arabidopsis* by adult *P. armoraciae* after *dsIMPI*- or *dsPaGTR5/6/7/8*-injection.** Excreted glucosinolate amounts per day were compared by two-tailed Student's *t*-test or Mann-Whitney *U* test ( $n = 10$  biological replicates, feces of six beetles per replicate). Data are shown as mean  $\pm$  s.e.m. n.t., not tested; n.s., not significantly different; \* $P < 0.05$ ; \*\* $P < 0.01$ ; 3MSOP, 3-methylsulfinylpropyl; 4MSOB, 4-methylsulfinylbutyl; 5MSOP, 5-methylsulfinylpentyl; 7MSOH, 7-methylsulfinylheptyl; 8MSOO, 8-methylsulfinyloctyl; I3M, indol-3-ylmethyl; 4MOI3M, 4-methoxyindol-3-ylmethyl. *P* values are included in Supplementary Data 6.

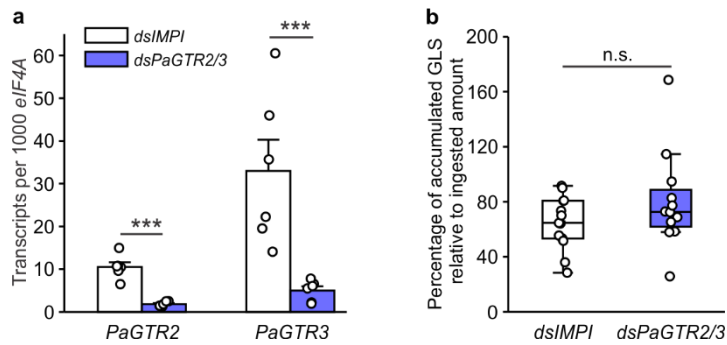

**Supplementary Figure 9. Effect of *dsPaGTR2/3* injection on gene expression and accumulation of ingested glucosinolates in adult *P. armoraciae* beetles.** Expression of *PaGTR2* and *PaGTR3* was analyzed in *dsIMPI*- and *dsPaGTR2/3*-injected beetles by quantitative PCR ( $n = 6$  biological replicates, two beetles per replicate). Data are shown as mean  $\pm$  s.e.m. **b** Accumulation of ingested glucosinolates in adult *P. armoraciae* beetles. Adults were fed for one day with *Arabidopsis* leaves, starved for one day, and collected for glucosinolate analysis. Accumulated glucosinolates (GLS): sum of 3-methylsulfinylpropyl GLS, 3-methylthiopropyl GLS, 4-methylsulfinylbutyl GLS, 4-methylthiobutyl GLS, 7-methylsulfinylheptyl GLS and 8-methylsulfinyloctyl GLS. Due to a high background of indolic GLS in beetles, it was not possible to quantify the accumulation of ingested indolic GLS from *Arabidopsis*. Box plots show the median, interquartile range, and outliers of each data set ( $n = 12-13$  biological replicates, three beetles per replicate). Treatments were compared by two-tailed Student's *t*-test. n.s., not significantly different; \*\*\* $P < 0.001$ . *P* values are included in Supplementary Data 6.

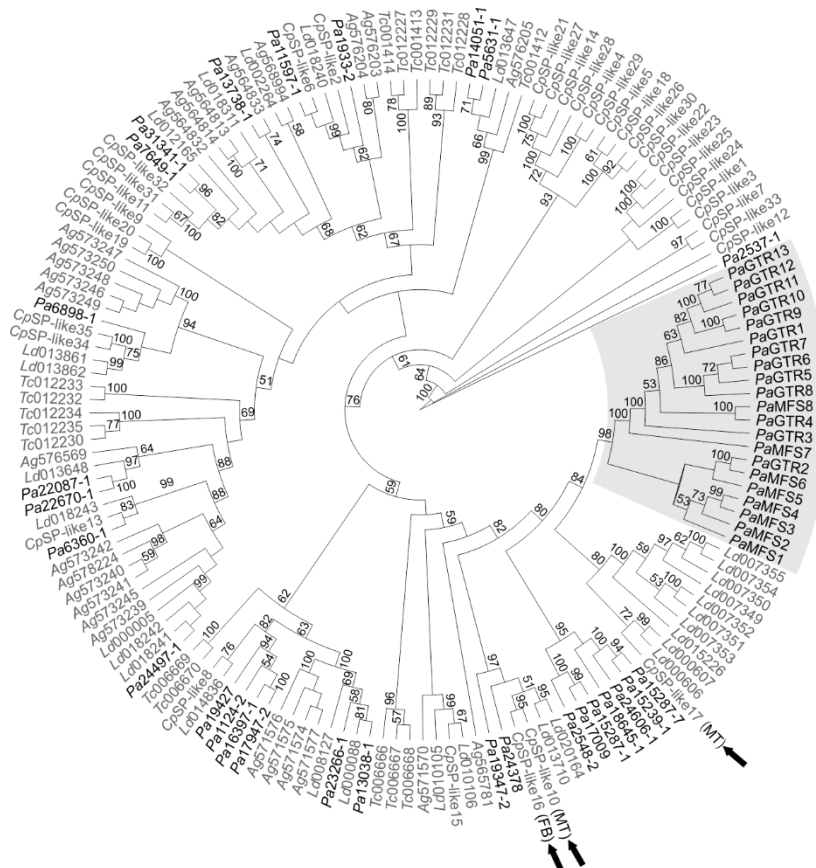

**Supplementary Figure 10. Diversification of coleopteran sugar porters.** Maximum-likelihood inferred phylogeny of a subset of predicted coleopteran sugar porters (Transporter Classification Database ID 2.A.1.1) identified in the *P. armoraciae* transcriptome (written in black) and the genomes of *Leptinotarsa decemlineata*, *Anoplophora glabripennis*, and *Tribolium castaneum* (marked with a black frame in Supplementary Data 3), and 35 sugar porters identified in the proteome of *Chrysomela populi* (transporter names are written in grey). The *P. armoraciae*-specific clade investigated in this study is highlighted with a grey background. The tissue-specific localization of three sugar porters from *C. populi* that are closely related to *PaGTRs* is written in parentheses behind the transporter names. MT, Malpighian tubules; FB, fat body. Bootstrap support values higher than 50% are indicated on the corresponding branches. The tree was rooted with a putative vesicular neurotransmitter transporter (Transporter Classification Database ID 2.A.1.14) from *P. armoraciae* (Pa2537-1).

1 **Supplementary Tables 1-5**

2 **Supplementary Table 1.** Glucosinolate (GLS) concentrations in the hemolymph of seven-day old adult *P. armoraciae*.

| Glucosinolate | Glucosinolate concentration (mM) |             |             |             |             |             | Mean ± SD       |
|---------------|----------------------------------|-------------|-------------|-------------|-------------|-------------|-----------------|
|               | Replicate 1                      | Replicate 2 | Replicate 3 | Replicate 4 | Replicate 5 | Replicate 6 |                 |
| 2Prop GLS     | 55.769                           | 59.682      | 97.330      | 67.331      | 67.277      | 80.198      | 71.265 ± 15.263 |
| 3But GLS      | 1.081                            | 4.937       | 3.670       | 3.791       | 3.725       | 2.373       | 3.263 ± 1.343   |
| 2PE GLS       | 0.157                            | 0.302       | 0.938       | 0.704       | 0.280       | 0.342       | 0.454 ± 0.300   |
| Benzyl GLS    | 0.345                            | 0.386       | 0.634       | 0.735       | 0.401       | 0.258       | 0.460 ± 0.184   |
| I3M GLS       | 1.948                            | 1.811       | 3.118       | 2.626       | 1.289       | 1.702       | 2.082 ± 0.668   |
| Total         | 59.300                           | 67.118      | 105.689     | 75.187      | 72.972      | 84.873      | 77.523 ± 16.210 |

3 2Prop, 2-propenyl; 3But, 3-butenyl; 2PE, 2-phenylethyl; I3M, indol-3-ylmethyl.

4 **Supplementary Table 2.** Glucosinolate levels in *PaGTRI*-silenced and control beetles.

| Glucosinolate | nmol sequestered glucosinolate per adult (mean $\pm$ SD; $n = 10$ ) |                    | Statistical method <sup>1</sup>     | Statistics        | <i>P</i> value |
|---------------|---------------------------------------------------------------------|--------------------|-------------------------------------|-------------------|----------------|
|               | <i>dsIMPI</i>                                                       | <i>dsPaGTRI</i>    |                                     |                   |                |
| 3MSOP GLS     | 1.231 $\pm$ 0.195                                                   | 1.394 $\pm$ 0.282  | Two-tailed Student's <i>t</i> -test | <i>t</i> = -1.507 | 0.149          |
| 3MTP GLS      | 0.188 $\pm$ 0.051                                                   | 0.232 $\pm$ 0.088  | Two-tailed Student's <i>t</i> -test | <i>t</i> = -1.343 | 0.196          |
| 4MSOB GLS     | 3.487 $\pm$ 0.491                                                   | 4.087 $\pm$ 1.096  | Two-tailed Student's <i>t</i> -test | <i>t</i> = -1.581 | 0.131          |
| 4MTB GLS      | 10.256 $\pm$ 2.100                                                  | 11.200 $\pm$ 3.071 | Two-tailed Student's <i>t</i> -test | <i>t</i> = -0.803 | 0.433          |
| 5MSOP GLS     | 0.191 $\pm$ 0.046                                                   | 0.222 $\pm$ 0.032  | Two-tailed Student's <i>t</i> -test | <i>t</i> = -1.753 | 0.097          |
| 7MSOH GLS     | 0.119 $\pm$ 0.032                                                   | 0.158 $\pm$ 0.030  | Two-tailed Student's <i>t</i> -test | <i>t</i> = -2.830 | 0.011          |
| 8MSOO GLS     | 1.135 $\pm$ 0.286                                                   | 1.306 $\pm$ 0.441  | Two-tailed Student's <i>t</i> -test | <i>t</i> = -1.028 | 0.317          |
| 2Prop GLS     | 55.841 $\pm$ 7.800                                                  | 52.509 $\pm$ 3.984 | Mann-Whitney <i>U</i> test          | <i>U</i> = 38.000 | 0.385          |
| 3But GLS      | 0.935 $\pm$ 0.161                                                   | 1.007 $\pm$ 0.295  | Two-tailed Student's <i>t</i> -test | <i>t</i> = -0.683 | 0.503          |
| I3M GLS       | 2.830 $\pm$ 0.467                                                   | 0.889 $\pm$ 0.303  | Two-tailed Student's <i>t</i> -test | <i>t</i> = 10.975 | < 0.001        |
| 4OHI3M GLS    | 0.002 $\pm$ 0.004                                                   | 0.002 $\pm$ 0.002  | Mann-Whitney <i>U</i> test          | <i>U</i> = 50.000 | 1              |
| 4MOI3M GLS    | 0.159 $\pm$ 0.084                                                   | 0.227 $\pm$ 0.095  | Two-tailed Student's <i>t</i> -test | <i>t</i> = -1.687 | 0.109          |
| 1MOI3M GLS    | 0.026 $\pm$ 0.008                                                   | 0.004 $\pm$ 0.002  | Mann-Whitney <i>U</i> test          | <i>U</i> = 0.000  | < 0.001        |
| Total         | 76.399 $\pm$ 8.738                                                  | 73.248 $\pm$ 4.350 | Two-tailed Student's <i>t</i> -test | <i>t</i> = 1.021  | 0.321          |

5 <sup>1</sup>Analyses were performed using SigmaPlot 14.0. 3MSOP, 3-methylsulfinylpropyl; 3MTP, 3-methylthiopropyl; 4MSOB, 4-methylsulfinylbutyl;  
6 4MTB, 4-methylthiobutyl; 5MSOP, 5-methylsulfinylpentyl; 7MSOH, 7-methylsulfinylheptyl; 8MSOO, 8-methylsulfinyloctyl; 2Prop, 2-propenyl;  
7 3But, 3-butenyl; I3M, indol-3-ylmethyl; 4OHI3M, 4-hydroxyindol-3-ylmethyl; 4MOI3M, 4-methoxyindol-3-ylmethyl; 1MOI3M, 1-methoxyindol-  
8 3-ylmethyl.

9 **Supplementary Table 3.** Glucosinolate levels in *PaGTR5/6/7/8*-silenced and control beetles.

| Glucosinolate | nmol sequestered glucosinolate per adult (mean $\pm$ SD; $n = 10$ ) |                       | Transformation    | Statistics <sup>1</sup> | P value |
|---------------|---------------------------------------------------------------------|-----------------------|-------------------|-------------------------|---------|
|               | <i>dsIMPI</i>                                                       | <i>dsPaGTR5/6/7/8</i> |                   |                         |         |
| 3MSOP GLS     | 1.859 $\pm$ 0.217                                                   | 1.713 $\pm$ 0.251     | -                 | $t = 1.388$             | 0.182   |
| 3MTP GLS      | 0.432 $\pm$ 0.098                                                   | 0.318 $\pm$ 0.087     | -                 | $t = 2.739$             | 0.013   |
| 4MSOB GLS     | 4.555 $\pm$ 0.802                                                   | 4.582 $\pm$ 0.855     | -                 | $t = -0.073$            | 0.943   |
| 4MTB GLS      | 14.793 $\pm$ 1.872                                                  | 12.287 $\pm$ 2.012    | -                 | $t = 2.882$             | 0.010   |
| 5MSOP GLS     | 0.295 $\pm$ 0.048                                                   | 0.315 $\pm$ 0.077     | Square-root       | $t = -0.648$            | 0.525   |
| 7MSOH GLS     | 0.218 $\pm$ 0.026                                                   | 0.220 $\pm$ 0.045     | -                 | $t = -0.139$            | 0.891   |
| 8MSOO GLS     | 1.317 $\pm$ 0.195                                                   | 1.281 $\pm$ 0.376     | -                 | $t = 0.263$             | 0.795   |
| 2Prop GLS     | 54.667 $\pm$ 5.272                                                  | 47.919 $\pm$ 5.412    | -                 | $t = 2.825$             | 0.011   |
| 3But GLS      | 1.287 $\pm$ 0.360                                                   | 1.456 $\pm$ 0.584     | Log <sub>10</sub> | $t = -0.791$            | 0.439   |
| I3M GLS       | 4.227 $\pm$ 0.487                                                   | 5.225 $\pm$ 0.907     | -                 | $t = -3.069$            | 0.007   |
| 4MOI3M GLS    | 0.301 $\pm$ 0.140                                                   | 0.440 $\pm$ 0.173     | -                 | $t = -1.977$            | 0.064   |
| 1MOI3M GLS    | 0.070 $\pm$ 0.010                                                   | 0.070 $\pm$ 0.017     | -                 | $t = -0.010$            | 0.992   |
| Total         | 84.021 $\pm$ 5.319                                                  | 75.828 $\pm$ 4.321    | -                 | $t = 3.781$             | 0.001   |

10 <sup>1</sup>Analyses were performed with two-tailed Student's *t*-test using SigmaPlot 14.0. 3MSOP, 3-methylsulfinylpropyl; 3MTP, 3-methylthiopropyl;  
 11 4MSOB, 4-methylsulfinylbutyl; 4MTB, 4-methylthiobutyl; 5MSOP, 5-methylsulfinylpentyl; 7MSOH, 7-methylsulfinylheptyl; 8MSOO, 8-  
 12 methylsulfinyloctyl; 2Prop, 2-propenyl; 3But, 3-butenyl; I3M, indol-3-ylmethyl; 4MOI3M, 4-methoxyindol-3-ylmethyl; 1MOI3M, 1-methoxyindol-  
 13 3-ylmethyl.

14 **Supplementary Table 4.** Gene expression variability across tissues among four tested reference genes.

| <b>Target gene</b> | <b>Tissue</b>      | <b>Mean Cq value of four biological replicates</b> | <b>Standard deviation of the mean Cq values</b> |
|--------------------|--------------------|----------------------------------------------------|-------------------------------------------------|
| <i>eIF4A</i>       | Foregut            | 21.70                                              | 0.30                                            |
|                    | Midgut             | 21.96                                              |                                                 |
|                    | Hindgut            | 21.62                                              |                                                 |
|                    | Malpighian tubules | 21.39                                              |                                                 |
|                    | Other tissues      | 21.17                                              |                                                 |
| <i>RPL13a</i>      | Foregut            | 20.81                                              | 0.31                                            |
|                    | Midgut             | 20.44                                              |                                                 |
|                    | Hindgut            | 20.98                                              |                                                 |
|                    | Malpighian tubules | 20.22                                              |                                                 |
|                    | Other tissues      | 20.49                                              |                                                 |
| <i>RPL7</i>        | Foregut            | 21.42                                              | 0.42                                            |
|                    | Midgut             | 20.39                                              |                                                 |
|                    | Hindgut            | 21.12                                              |                                                 |
|                    | Malpighian tubules | 20.63                                              |                                                 |
|                    | Other tissues      | 20.62                                              |                                                 |
| <i>RPS4e</i>       | Foregut            | 21.37                                              | 0.46                                            |
|                    | Midgut             | 20.44                                              |                                                 |
|                    | Hindgut            | 21.39                                              |                                                 |
|                    | Malpighian tubules | 20.77                                              |                                                 |
|                    | Other tissues      | 20.52                                              |                                                 |

15 **Supplementary Table 5.** Multiple reaction monitoring (MRM) transitions for compounds determined by LC-MS/MS.

| Compound                    | Q1 [m/z] | Q3 [m/z]          | CE [eV] | Use                                                                      |
|-----------------------------|----------|-------------------|---------|--------------------------------------------------------------------------|
| 2Prop GLS                   | 358      | 95.9              | -60     |                                                                          |
| 4MSOB GLS                   | 435.9    | 95.8              | -60     |                                                                          |
| 4MTB GLS                    | 419.9    | 95.9              | -58     |                                                                          |
| 2PE GLS                     | 421.81   | 95.9              | -50     |                                                                          |
| Benzyl GLS                  | 408      | 95.9              | -60     | All samples except those of<br>the pH-dependency<br>experiment using the |
| 4OHBenz GLS                 | 424      | 95.9              | -60     |                                                                          |
| I3M GLS                     | 447      | 95.8              | -50     |                                                                          |
| 3But                        | 372      | 95.9              | -60     | <i>Xenopus</i> oocyte expression<br>system                               |
| Salicin                     | 285      | 123               | -18     |                                                                          |
| Dhurrin                     | 310      | 179               | -10     |                                                                          |
| Linamarin (formiate adduct) | 292      | 45                | -26     |                                                                          |
| Aucubin (formiate adduct)   | 391      | 183               | -18     |                                                                          |
| Catalpol (formiate adduct)  | 407      | 199               | -18     |                                                                          |
| 2Prop GLS                   | 358      | 97.0 <sup>Q</sup> | 22      |                                                                          |
|                             | 358      | 75                | 30      | Samples of the pH-<br>dependency experiment                              |
|                             | 358      | 259               | 20      |                                                                          |
| I3M GLS                     | 447      | 97.0 <sup>Q</sup> | 10      | using the <i>Xenopus</i> oocyte<br>expression system                     |
|                             | 447      | 259               | 10      |                                                                          |
|                             | 447      | 205               | 10      |                                                                          |

16 <sup>Q</sup>quantifier ion, additional transitions are used for identification only. 2Prop, 2-propenyl; 4MSOB, 4-methylsulfinylbutyl; 4MTB, 4-methylthiobutyl;  
 17 2PE, 2-phenylethyl; 4OHBenz, 4-hydroxybenzyl; I3M, indol-3-ylmethyl; 3But, 3-butenyl.
